# Supplementary material for: Fine-mapping of intracranial aneurysm susceptibility based on a genome-wide association study
Source: PubMed Central journal article supplement (PMC8854430; doi:10.1038/s41598-022-06755-x), 2022-02-17
Supplement: 41598_2022_6755_MOESM1_ESM.pdf [file 41598_2022_6755_MOESM1_ESM.pdf]

## **Fine-Mapping of Intracranial Aneurysm Susceptibility Based on a Genome-Wide Association Study**

Eun Pyo Hong<sup>1</sup>, Dong Hyuk Youn<sup>1</sup>, Bong Jun Kim<sup>1</sup>, Jun Hyong Ahn<sup>2</sup>, Jeong Jin Park<sup>3</sup>, Jong Kook Rhim<sup>4</sup>, Heung Cheol Kim<sup>5</sup>, Gyojun Hwang<sup>6</sup>, Hong Jun Jeon<sup>7</sup> & Jin Pyeong Jeon<sup>7\*</sup>

<sup>1</sup>Institute of New Frontier Research, Hallym University College of Medicine, Chuncheon, Republic of Korea.

<sup>2</sup>Department of Neurosurgery, Gangwon National University College of Medicine, Chuncheon, Gangwon-do, Republic of Korea

<sup>3</sup>Department of Neurology, Konkuk Medical Center, Seoul, Republic of Korea

<sup>4</sup>Department of Neurosurgery, Jeju National University College of Medicine, Jeju, Republic of Korea

<sup>5</sup>Department of Radiology, Hallym University College of Medicine, Chuncheon, Gangwon-do, Republic of Korea

<sup>6</sup>Department of Neurosurgery, DMC Bundang Jesaeng Hospital, Seongnam, Gyeonggi-do, Republic of Korea

<sup>7</sup>Department of Neurosurgery, Hallym University College of Medicine, Chuncheon, Gangwon-do, Republic of Korea

## SUPPLEMENTAL DATA

**Supplementary Figure S1.** Study workflow of genome-wide association study, fine-mapping, and further functional research. APMRA, Axiom<sup>TH</sup> Asian Precision Medicine Research Array; GWA, genome-wide association.

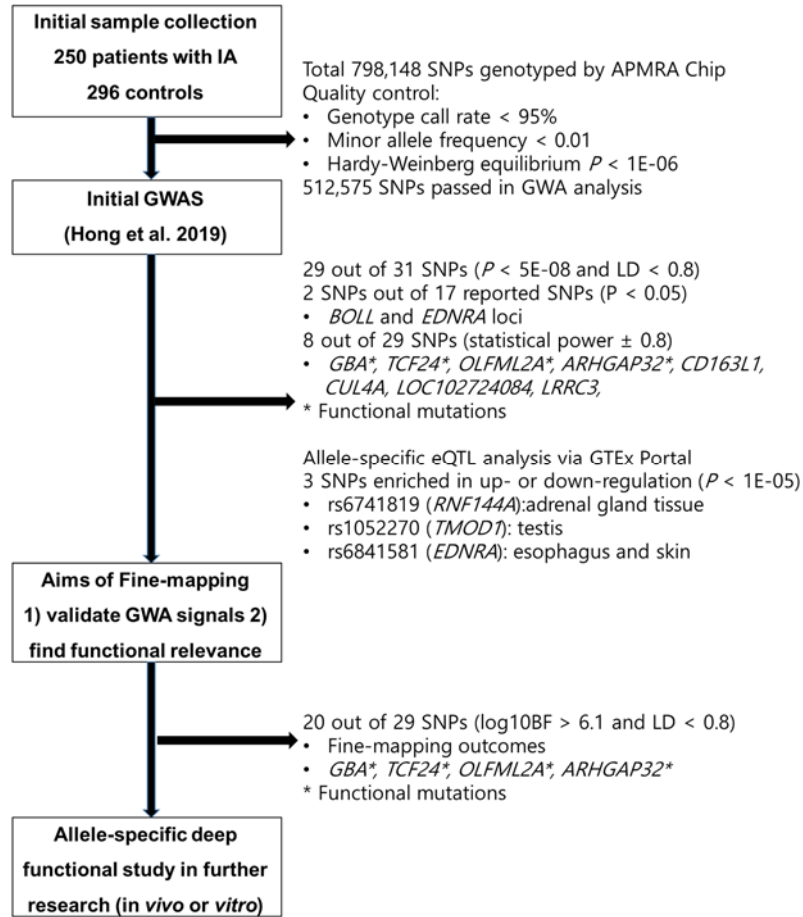

**Supplementary Table S1.** Comparison of genome-wide association study and FINEMAP results in intracranial aneurysm

| Gene                          | Chr      | SNP         | Position  | Function       | Major <sup>a</sup> | Minor <sup>a</sup> | MAF   | HWE p    | lnOR <sup>b</sup> | P in GWAS <sup>b</sup> | log10BF <sup>c</sup> | PIP <sup>c</sup> | <i>h</i> <sup>2c</sup> |
|-------------------------------|----------|-------------|-----------|----------------|--------------------|--------------------|-------|----------|-------------------|------------------------|----------------------|------------------|------------------------|
| <i>PRDM2</i>                  | 1p36.21  | rs61775135  | 14148407  | intronic       | C                  | A                  | 0.285 | 0.626    | -1.15             | 3.59E-13               | 9.48                 | 2.61E-06         | 0.073                  |
| <i>GBA</i>                    | 1q22     | rs75822236  | 155204793 | R535H          | C                  | T                  | 0.166 | 1        | 5.08              | 1.09E-19               | 15.06                | 1.0000           | 0.109                  |
| <i>FMO4</i>                   | 1q24.3   | rs3737926   | 171303565 | F281F          | C                  | T                  | 0.264 | 0.079    | -1.01             | 1.83E-10               | 7.10                 | 1.10E-08         | 0.058                  |
| <i>RNF144A</i>                | 2p25.1   | rs6741819   | 7147973   | intronic       | C                  | T                  | 0.247 | 0.022    | -1.38             | 4.05E-14               | 10.30                | 0.0905           | 0.079                  |
| <i>HDAC4,LOC150935</i>        | 2q37.3   | rs59626274  | 240500249 | intergenic     | C                  | T                  | 0.248 | 0.002    | -1.34             | 5.78E-14               | 10.18                | 0.0679           | 0.078                  |
| <i>LINC01237</i>              | 2q37.3   | rs78458145  | 242877035 | ncRNA_intronic | G                  | A                  | 0.285 | 0.007    | -1.41             | 3.14E-15               | 11.27                | 0.8416           | 0.085                  |
| <i>SPCS3,VEGFC</i>            | 4q34.2   | rs17688188  | 177471059 | intergenic     | G                  | A                  | 0.222 | 0.030    | -1.31             | 5.99E-13               | 9.29                 | 0.9999           | 0.072                  |
| <i>TCF24</i>                  | 8q13.1   | rs112859779 | 67860369  | G141S          | C                  | T                  | 0.216 | 2.02E-04 | -1.69             | 3.33E-16               | 12.12                | 1.0000           | 0.090                  |
| <i>CCDC171,C9orf92</i>        | 9p22.3   | rs12350582  | 16135142  | intergenic     | A                  | G                  | 0.255 | 0.841    | 0.89              | 1.49E-08               | 5.44                 | 3.34E-10         | 0.046                  |
| <i>LINGO2</i>                 | 9p21.1   | rs56942085  | 28518911  | intronic       | G                  | A                  | 0.061 | 1        | 1.81              | 3.90E-08               | 5.07                 | 1.42E-10         | 0.044                  |
| <i>TMOD1</i>                  | 9q22.33  | rs1052270   | 100275424 | intronic       | C                  | T                  | 0.344 | 0.042    | -0.89             | 2.71E-08               | 5.21                 | 1.97E-10         | 0.045                  |
| <i>MIR3134</i>                | 9q31.3   | rs79461840  | 114822158 | ncRNA_intronic | T                  | C                  | 0.076 | 0.003    | 1.93              | 1.40E-08               | 5.46                 | 3.51E-10         | 0.046                  |
| <i>LOC101928775,LINC00474</i> | 9q33.1   | rs4979583   | 118571428 | intergenic     | C                  | T                  | 0.325 | 0.874    | 0.90              | 4.61E-09               | 5.88                 | 9.29E-10         | 0.049                  |
| <i>OLFML2A</i>                | 9q33.3   | rs79134766  | 127561723 | A208T          | G                  | A                  | 0.219 | 0.054    | -1.97             | 1.70E-19               | 14.92                | 1.0000           | 0.107                  |
| <i>MYEOV,LINC01488</i>        | 11q13.3  | rs76855873  | 69154455  | intergenic     | C                  | T                  | 0.269 | 0.023    | -1.11             | 1.23E-11               | 8.15                 | 1.89E-13         | 0.064                  |
| <i>ARHGAP32</i>               | 11q24.3  | rs371331393 | 128839272 | stopgain       | G                  | A                  | 0.171 | 1        | 3.77              | 9.32E-27               | 20.88                | 1.0000           | 0.143                  |
| <i>CD163L1</i>                | 12p13.31 | rs138525217 | 7528192   | splicing       | C                  | T                  | 0.161 | 1        | 4.33              | 6.20E-23               | 17.77                | 1.0000           | 0.125                  |
| <i>SLC2A14</i>                | 12p13.31 | rs118107419 | 7980394   | intronic       | C                  | A                  | 0.262 | 0.012    | -1.40             | 1.44E-14               | 10.71                | 8.60E-08         | 0.081                  |
| <i>DRAM1,CCDC53</i>           | 12q23.2  | rs7964241   | 102338235 | intergenic     | A                  | G                  | 0.278 | 0.166    | 0.91              | 1.95E-08               | 5.33                 | 3.58E-13         | 0.045                  |
| <i>DRAM1,CCDC53</i>           | 12q23.2  | rs56168082  | 102339295 | intergenic     | G                  | A                  | 0.276 | 0.166    | 0.89              | 3.93E-08               | 5.07                 | 1.97E-13         | 0.044                  |
| <i>CUL4A,LAMP1</i>            | 13q34    | rs74115822  | 113931854 | intergenic     | G                  | A                  | 0.112 | 0.001    | 1.83              | 1.12E-10               | 7.32                 | 0.9960           | 0.058                  |
| <i>MIR365A,PARN</i>           | 16p13.12 | rs11646803  | 14463359  | intergenic     | C                  | T                  | 0.376 | 0.074    | -0.79             | 4.76E-10               | 6.77                 | 0.9422           | 0.055                  |
| <i>LOC102724084</i>           | 16q23.2  | rs75861150  | 80193070  | ncRNA_intronic | T                  | C                  | 0.091 | 2.17E-04 | -1.93             | 1.27E-08               | 5.51                 | 0.0520           | 0.046                  |
| <i>SCARF1</i>                 | 17p13.3  | 17_1538628  | 1538628   | E639E          | G                  | C                  | 0.265 | 0.147    | -0.94             | 6.02E-09               | 5.79                 | 0.0008           | 0.048                  |

|                     |          |             |          |                |   |   |       |          |       |          |       |        |       |
|---------------------|----------|-------------|----------|----------------|---|---|-------|----------|-------|----------|-------|--------|-------|
| <i>MINK1</i>        | 17p13.2  | rs72835045  | 4780795  | intronic       | G | A | 0.220 | 1.16E-06 | -1.38 | 1.69E-12 | 8.92  | 0.9984 | 0.069 |
| <i>SLC47A1</i>      | 17p11.2  | rs2440154   | 19444987 | intronic       | G | A | 0.204 | 0.791    | 0.98  | 1.42E-08 | 5.47  | 0.0004 | 0.046 |
| <i>SLC47A1</i>      | 17p11.2  | rs2289668   | 19454640 | intronic       | C | T | 0.204 | 0.791    | 0.98  | 1.43E-08 | 5.46  | 0.0004 | 0.046 |
| <i>NAPA-AS1</i>     | 19q13.32 | rs55800589  | 47990889 | ncRNA_intronic | G | C | 0.364 | 2.37E-06 | -0.96 | 3.35E-13 | 9.53  | 1.0000 | 0.073 |
| <i>DSCAM</i>        | 21q22.2  | rs727333    | 41702947 | intronic       | C | A | 0.257 | 4.75E-04 | -1.36 | 3.69E-14 | 10.38 | 0.1247 | 0.077 |
| <i>LRRC3</i>        | 21q22.3  | rs116969723 | 45876716 | P63P           | G | A | 0.233 | 0.014    | -1.45 | 3.83E-15 | 11.23 | 0.8753 | 0.083 |
| <i>RFPL2,SLC5A4</i> | 22q12.3  | rs117398778 | 32609178 | intergenic     | T | C | 0.138 | 1.56E-05 | 1.32  | 2.00E-09 | 6.24  | 0.9397 | 0.051 |

GWAS, genome-wide association study; HWE p, Hardy-Weinberg equilibrium (HWE) p-value; log10BF, log10 transformed Bayes factor; lnOR, natural log-transformed odds ratio; PIP, posterior probability; MAF, minor allele frequency.

<sup>a</sup> major/minor allele type.

<sup>b</sup> lnOR and *P*-value were estimated by IA GWAS.

<sup>c</sup> PIP, log10BF, and heritability ( $h^2$ ) of individual variants were estimated via FINEMAP program to identify causal susceptibility to IA.

**Supplementary Table S2.** Expression of four causal candidate genes in 13 brain tissues, 4 blood vessels (3 artery tissues and EBV cells), and whole blood (transcripts per millions, TPM)

| Tissue or cell types, TPM values     | <i>GBA</i> | <i>TCF24</i> | <i>OLFML2A</i> | <i>ARHGAP32</i> |
|--------------------------------------|------------|--------------|----------------|-----------------|
| Artery-Aorta                         | 26.6381    | 0.0000       | 2.3707         | 4.8536          |
| Artery-Coronary                      | 22.6014    | 0.0000       | 8.8402         | 4.3448          |
| Artery-Tibial                        | 18.5048    | 0.0000       | 9.5401         | 3.8799          |
| Cells-EBV-transformed lymphocytes    | 13.2542    | 0.0000       | 0.4718         | 0.0667          |
| Brain-Amygdala                       | 6.4943     | 0.0758       | 1.0522         | 9.2092          |
| Brain-Anteriorcingulatecortex(BA24)  | 8.5819     | 0.0529       | 0.9995         | 13.5215         |
| Brain-Caudate(basalganglia)          | 9.8782     | 0.0782       | 1.2439         | 12.8529         |
| Brain-CerebellarHemisphere           | 9.8881     | 0.0000       | 0.7039         | 4.8586          |
| Brain-Cerebellum                     | 9.5836     | 0.0166       | 1.0395         | 7.3319          |
| Brain-Cortex                         | 10.6011    | 0.0549       | 1.4575         | 19.6950         |
| Brain-FrontalCortex(BA9)             | 13.1018    | 0.0508       | 1.1425         | 23.0975         |
| Brain-Hippocampus                    | 6.9035     | 0.0895       | 1.1693         | 6.8002          |
| Brain-Hypothalamus                   | 10.5743    | 0.1027       | 1.1759         | 6.1858          |
| Brain-Nucleusaccumbens(basalganglia) | 10.6235    | 0.0644       | 0.7168         | 12.7685         |
| Brain-Putamen(basalganglia)          | 7.9459     | 0.0384       | 1.2849         | 9.1537          |
| Brain-Spinalcord(cervicalc-1)        | 13.7758    | 0.1448       | 1.2204         | 4.5931          |
| Brain-Substantianigra                | 8.7868     | 0.0567       | 1.3471         | 5.0176          |
| WholeBlood                           | 33.1310    | 0.0000       | 0.0980         | 0.2274          |

**Supplementary Table S3.** Associations of 29 SNPs in the previous GWAS (Hong et al. 2019) and replication stages.

| Gene                           | Chr      | SNP         | M | m | MAF   | HWE p    | Stage 1 <sup>a</sup> |                | Stage 2 <sup>b</sup> |                | Stage 3 <sup>c</sup> |                |
|--------------------------------|----------|-------------|---|---|-------|----------|----------------------|----------------|----------------------|----------------|----------------------|----------------|
|                                |          |             |   |   |       |          | lnOR <sup>e</sup>    | P <sup>e</sup> | ln(OR) <sup>e</sup>  | P <sup>e</sup> | ln(OR) <sup>d</sup>  | P <sup>d</sup> |
| <i>PRDM2</i>                   | 1p36.21  | rs61775135  | C | A | 0.285 | 0.626    | -1.15                | 3.59E-13       | 4.00                 | 0.7495         | NA                   | NA             |
| <i>GBA</i>                     | 1q22     | rs75822236  | C | T | 0.166 | 1        | 5.08                 | 1.09E-19       | NA                   | NA             | NA                   | NA             |
| <i>FMO4</i>                    | 1q24.3   | rs3737926   | C | T | 0.264 | 0.079    | -1.01                | 1.83E-10       | 0.24                 | 0.7801         | NA                   | NA             |
| <i>RNF144A</i>                 | 2p25.1   | rs6741819   | C | T | 0.247 | 0.022    | -1.38                | 4.05E-14       | -1.57                | 0.06768        | NA                   | NA             |
| <i>HDAC4, LOC150935</i>        | 2q37.3   | rs59626274  | C | T | 0.248 | 0.002    | -1.34                | 5.78E-14       | 1.17                 | 0.4364         | -0.59                | 0.2636         |
| <i>LINC01237</i>               | 2q37.3   | rs78458145  | G | A | 0.285 | 0.007    | -1.41                | 3.14E-15       | -1.13                | 0.09543        | NA                   | NA             |
| <i>SPCS3, VEGFC</i>            | 4q34.2   | rs17688188  | G | A | 0.222 | 0.03     | -1.31                | 5.99E-13       | 1.33                 | 0.04135        | NA                   | NA             |
| <i>TCF24</i>                   | 8q13.1   | rs112859779 | C | T | 0.216 | 2.02E-04 | -1.69                | 3.33E-16       | 0.19                 | 0.8588         | NA                   | NA             |
| <i>CCDC171, C9orf92</i>        | 9p22.3   | rs12350582  | A | G | 0.255 | 0.841    | 0.89                 | 1.49E-08       | -0.01                | 0.9763         | 0.31                 | 0.1932         |
| <i>LINGO2</i>                  | 9p21.1   | rs56942085  | G | A | 0.061 | 1        | 1.81                 | 3.90E-08       | 0.86                 | 0.2593         | 0.78                 | 0.03301        |
| <i>TMOD1</i>                   | 9q22.33  | rs1052270   | C | T | 0.344 | 0.042    | -0.89                | 2.71E-08       | -0.76                | 0.107          | -0.47                | 0.05375        |
| <i>MIR3134</i>                 | 9q31.3   | rs79461840  | T | C | 0.076 | 0.003    | 1.93                 | 1.40E-08       | 2.17                 | 0.00245        | NA                   | NA             |
| <i>LOC101928775, LINC00474</i> | 9q33.1   | rs4979583   | C | T | 0.325 | 0.874    | 0.9                  | 4.61E-09       | 0.78                 | 0.03896        | NA                   | NA             |
| <i>OLFML2A</i>                 | 9q33.3   | 9_127561723 | G | A | 0.219 | 0.054    | -1.97                | 1.70E-19       | NA                   | NA             | NA                   | NA             |
| <i>MYEOV, LINC01488</i>        | 11q13.3  | rs76855873  | C | T | 0.269 | 0.023    | -1.11                | 1.23E-11       | 0.76                 | 0.308          | NA                   | NA             |
| <i>ARHGAP32</i>                | 11q24.3  | rs371331393 | G | A | 0.171 | 1        | 3.77                 | 9.32E-27       | NA                   | NA             | NA                   | NA             |
| <i>CDI63L1</i>                 | 12p13.31 | rs138525217 | C | T | 0.161 | 1        | 4.33                 | 6.20E-23       | NA                   | NA             | NA                   | NA             |
| <i>SLC2A14</i>                 | 12p13.31 | rs118107419 | C | A | 0.262 | 0.012    | -1.4                 | 1.44E-14       | 0.58                 | 0.5324         | 0.60                 | 0.05648        |
| <i>DRAM1, CCDC53</i>           | 12q23.2  | rs7964241   | A | G | 0.278 | 0.166    | 0.91                 | 1.95E-08       | 0.95                 | 0.0465         | 0.32                 | 0.1598         |
| <i>CUL4A, LAMP1</i>            | 13q34    | rs74115822  | G | A | 0.112 | 0.001    | 1.83                 | 1.12E-10       | -1.80                | 0.154          | NA                   | NA             |
| <i>MIR365A, PARN</i>           | 16p13.12 | rs11646803  | C | T | 0.376 | 0.074    | -0.79                | 4.76E-10       | -0.02                | 0.971          | NA                   | NA             |
| <i>LOC102724084</i>            | 16q23.2  | rs75861150  | T | C | 0.091 | 2.17E-04 | -1.93                | 1.27E-08       | -16.60               | 0.9906         | NA                   | NA             |
| <i>SCARF1</i>                  | 17p13.3  | 17_1538628  | G | C | 0.265 | 0.147    | -0.94                | 6.02E-09       | 1.16                 | 0.1904         | 1.10                 | 1.17E-04       |
| <i>MINK1</i>                   | 17p13.2  | rs72835045  | G | A | 0.22  | 1.16E-06 | -1.38                | 1.69E-12       | 1.83                 | 0.1472         | NA                   | NA             |

|                      |          |             |   |   |       |          |       |          |       |         |      |         |
|----------------------|----------|-------------|---|---|-------|----------|-------|----------|-------|---------|------|---------|
| <i>SLC47A1</i>       | 17p11.2  | rs2440154   | G | A | 0.204 | 0.791    | 0.98  | 1.42E-08 | 0.97  | 0.03906 | 0.56 | 0.01104 |
| <i>NAPA-ASI</i>      | 19q13.32 | rs55800589  | G | C | 0.364 | 2.37E-06 | -0.96 | 3.35E-13 | NA    | NA      | NA   | NA      |
| <i>DSCAM</i>         | 21q22.2  | rs727333    | C | A | 0.257 | 4.75E-04 | -1.36 | 3.69E-14 | -0.39 | 0.5288  | NA   | NA      |
| <i>LRRC3</i>         | 21q22.3  | rs116969723 | G | A | 0.233 | 0.014    | -1.45 | 3.83E-15 | -1.11 | 0.4892  | NA   | NA      |
| <i>RFPL2, SLC5A4</i> | 22q12.3  | rs117398778 | T | C | 0.138 | 1.56E-05 | 1.32  | 2.00E-09 | 1.69  | 0.01276 | NA   | NA      |

HWE p, Hardy-Weinberg equilibrium p-value; M, major allele; m, minor allele; MAF, minor allele frequency.

<sup>a</sup> The estimation of stage 1 has been reported in the previous GWAS composed of 250 patients with IA and 296 controls (Hong et al. 2019 J Clin Med).

<sup>b</sup> Stage 2 shows replication results of 29 genome-wide significant signals in a hospital-based independent study composed of 50 patients with IA and 46 controls.

<sup>c</sup> Stage 3 shows replication results of 29 genome-wide significant signals in an independent study composed 50 hospital-based patients and 575 healthy controls without underlying diseases. Controls were extracted from 8,105 subjects the Rural and Mid-size City cohort in Korean Genome Epidemiology Study.

<sup>d</sup> Natural log-transformed odds ratio (ln(OR)) and p-values were estimated by multivariate logistic regression analysis adjusting for gender, age, hypertension, diabetes mellitus, hyperlipidemia, smoking status, and four principal component values.
